# Supplementary material
Source: ML conference proceedings conference paper supplement (https://openaccess.thecvf.com/content/ICCV2023/html/Noh_Simple_and_Effective_ICCV_2023_paper.html)
Supplement: Supplementary file 1 [file Noh_Simple_and_Effective_ICCV_2023_supplemental.pdf]

# 1. More Experiments for Cosine-based Softmax and Feature Norm

We present more experimental results to support our observation that the feature norms of OOD samples tends to decrease when the cosine-based softmax is used. We experiment with 2 models and 3 datasets. The models are ResNet34, DenseNet3 and the datasets are CIFAR-10, CIFAR-100, and SVHN. We use SVHN as the OOD dataset for CIFAR-10, and CIFAR-10 for SVHN. We also observe the feature norms of mixup samples by changing the mixup factor,  $\lambda$ , as we did in Section 3.1.

Various experiments also support our observation. When models are trained with the standard softmax, the average of feature norms is not always monotonically increase as shown (a), (c) and (e) of Figures 1 and 3. In the figures, the top of each bar represents the 1-quantile, and the bottom represents the 3-quantile of feature norms of mixup images. We can notify that the bar when  $\lambda = 0$  overlaps much with the bar when  $\lambda = 1$ , which mean that the distributions of OOD samples and normal samples overlaps much. We can also verify this from (b), (d), and (f) of Figures 1 and 3. The distribution of feature norms of OOD samples and that of normal samples overlap much each other. It means that the feature norms by the standard softmax are hardly useful for OOD detection.

However, the models are trained with the cosine-based softmax, the average of feature norms is monotonically increase as shown in (a), (c) and (e) of Figures 2 and 4. The overlaps between distributions of OOD samples and normal samples are small as shown in (b), (d), and (f) of Figures 2 and 4, which means that the feature norms by the cosine-based softmax are useful for OOD detection.

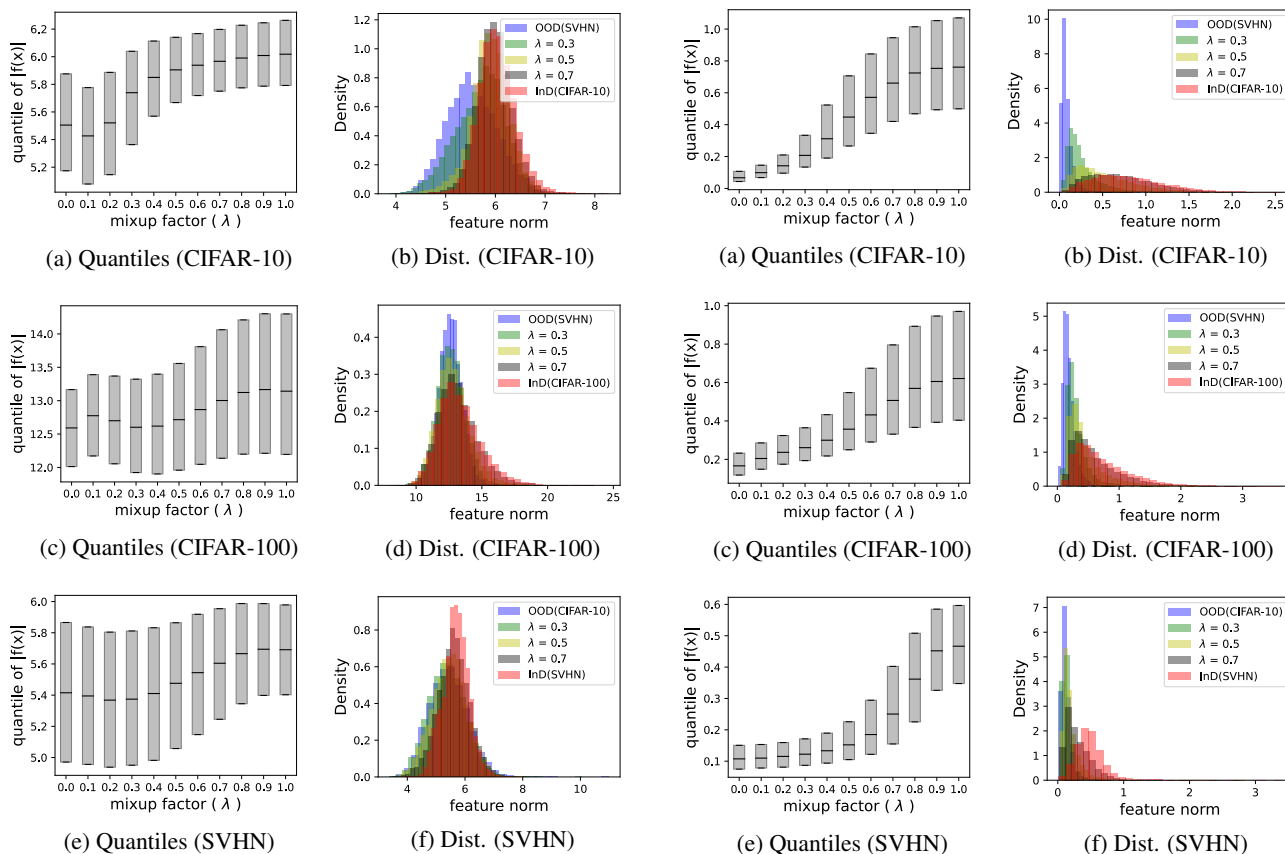

Figure 1: The quantile value of feature norms (a, c, e) and the distribution of feature norms (b, d, f) according to the mixup factor. (a) and (b) are for CIFAR-10 (InD) vs. SVHN (OOD), (c) and (d) are for CIFAR-100 vs. SVHN, and (e) and (f) are for SVHN vs CIFAR-10. The model is ResNet34 trained with the standard softmax.

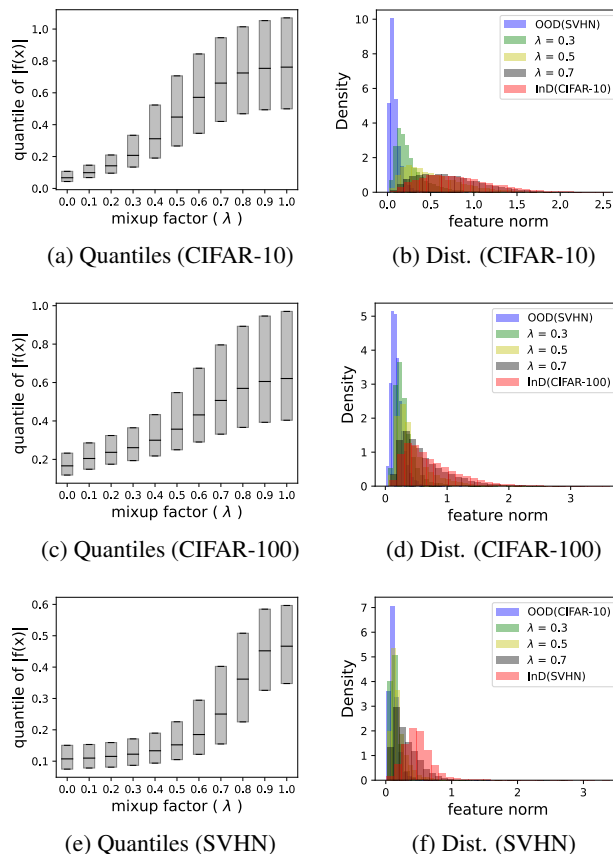

Figure 2: The quantile value of feature norms (a, c, e) and the distribution of feature norms (b, d, f). The model is ResNet34 trained with the cosine-based softmax.

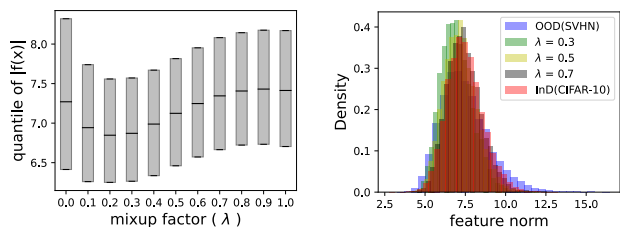

(a) Quantiles (CIFAR-10)

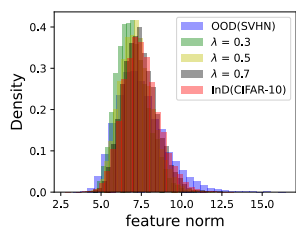

(b) Dist. (CIFAR-10)

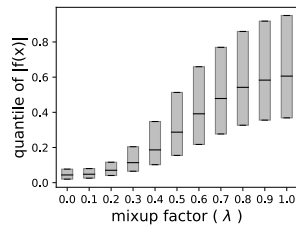

(a) Quantiles (CIFAR-10)

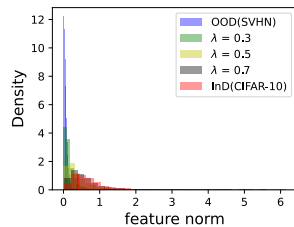

(b) Dist. (CIFAR-10)

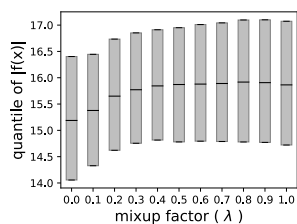

(c) Quantiles (CIFAR-100)

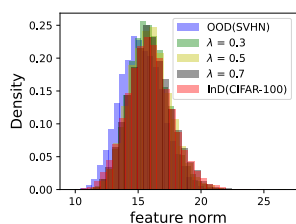

(d) Dist. (CIFAR-100)

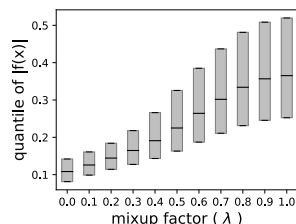

(c) Quantiles (CIFAR-100)

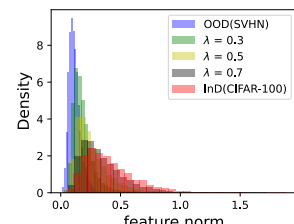

(d) Dist. (CIFAR-100)

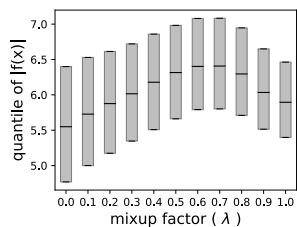

(e) Quantiles (SVHN)

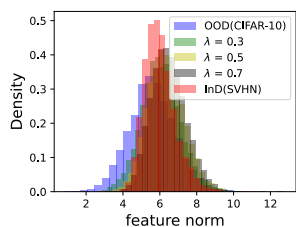

(f) Dist. (SVHN)

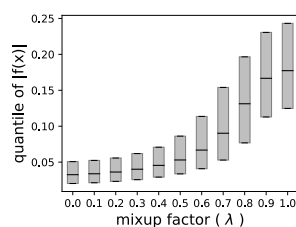

(e) Quantiles (SVHN)

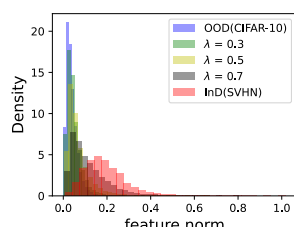

(f) Dist. (SVHN)

Figure 3: The quantile value of feature norms (a, c, e) and the distribution of feature norms (b, d, f). The model is DenseNet3 trained with the standard softmax.

Figure 4: The quantile value of feature norms (a, c, e) and the distribution of feature norms (b, d, f). The model is DenseNet3 trained with the cosine-based softmax.

## 2. Performance Evaluation with ResNet34

| OOD             | AUROC                        |             |        |             |              | TNR@95                       |             |        |             |              |
|-----------------|------------------------------|-------------|--------|-------------|--------------|------------------------------|-------------|--------|-------------|--------------|
|                 | Use a training dataset       |             |        |             |              | Use a training dataset       |             |        |             |              |
|                 | Use InD validation samples   |             |        |             | (Ours)       | Use InD validation samples   |             |        |             | (Ours)       |
|                 | Perform the input processing |             |        | GRAM        |              | Perform the input processing |             |        | GRAM        |              |
|                 | Use OOD samples              |             | G-ODIN |             |              | Use OOD samples              |             | G-ODIN |             |              |
| ODIN            | MAHA                         | ODIN        |        |             |              | MAHA                         |             |        |             |              |
| InD : CIFAR-10  |                              |             |        |             |              |                              |             |        |             |              |
| SVHN            | 96.7                         | 99.1        | 97.8   | <b>99.5</b> | 99.4         | 70.3                         | 87.8        | 89.5   | <b>97.6</b> | 97.1         |
| TINc            | 93.1                         | 98.6        | 96.0   | 99.2        | <b>99.7</b>  | 68.7                         | 92.0        | 81.1   | 96.7        | <b>99.0</b>  |
| TINr            | 94.0                         | 99.5        | 96.1   | <b>99.7</b> | <b>99.7</b>  | 67.9                         | 97.1        | 81.4   | <b>98.7</b> | 98.4         |
| LSUNc           | 91.2                         | 96.7        | 97.2   | 97.8        | <b>99.9</b>  | 92.0                         | 81.3        | 87.3   | 89.8        | <b>99.8</b>  |
| LSUNr           | 94.1                         | 99.7        | 98.0   | <b>99.9</b> | 99.8         | 82.1                         | 98.8        | 90.9   | <b>99.6</b> | 99.3         |
| iSUN            | 94.0                         | 99.5        | 97.6   | <b>99.8</b> | 99.7         | 73.2                         | 97.8        | 88.8   | <b>99.3</b> | 99.0         |
| MEAN            | 93.9                         | 98.9        | 97.1   | 99.3        | <b>99.7</b>  | 70.7                         | 92.5        | 86.5   | 97.0        | <b>98.8</b>  |
| InD : CIFAR-100 |                              |             |        |             |              |                              |             |        |             |              |
| SVHN            | 93.9                         | <b>98.4</b> | 93.2   | 96.0        | 96.0         | 62.7                         | <b>91.9</b> | 55.1   | 80.8        | 77.3         |
| TINc            | 85.4                         | 96.3        | 95.3   | 97.7        | <b>98.9</b>  | 44.3                         | 80.9        | 72.6   | 88.5        | <b>96.2</b>  |
| TINr            | 87.6                         | 98.2        | 95.9   | <b>98.9</b> | 98.7         | 36.1                         | 90.9        | 76.5   | <b>94.8</b> | 93.2         |
| LSUNc           | 82.7                         | 92.0        | 93.8   | 92.1        | <b>99.4</b>  | 44.1                         | 64.8        | 95.7   | 64.8        | <b>97.9</b>  |
| LSUNr           | 85.6                         | 98.2        | 96.1   | <b>99.2</b> | 98.8         | 23.2                         | 90.9        | 76.8   | <b>96.6</b> | 94.6         |
| iSUN            | 85.5                         | 97.9        | 95.7   | <b>98.8</b> | 98.5         | 45.2                         | 89.9        | 75.3   | <b>94.8</b> | 92.5         |
| MEAN            | 86.8                         | 96.8        | 95.0   | 97.1        | <b>98.4</b>  | 42.6                         | 84.9        | 75.3   | 86.7        | <b>92.0</b>  |
| InD : SVHN      |                              |             |        |             |              |                              |             |        |             |              |
| CIFAR-10        | 92.1                         | 99.3        | -      | 97.3        | <b>99.4</b>  | 79.8                         | <b>98.4</b> | -      | 85.8        | 98.3         |
| CIFAR-100       | -                            | -           | -      | -           | <b>99.4</b>  | -                            | -           | -      | -           | <b>98.1</b>  |
| TINc            | -                            | -           | -      | -           | <b>100.0</b> | -                            | -           | -      | -           | <b>100.0</b> |
| TINr            | 92.0                         | <b>99.9</b> | -      | 99.7        | <b>99.9</b>  | 82.0                         | <b>99.9</b> | -      | 99.3        | 99.8         |
| LSUNc           | -                            | -           | -      | -           | <b>100.0</b> | -                            | -           | -      | -           | <b>100.0</b> |
| LSUNr           | 89.4                         | <b>99.9</b> | -      | 99.8        | <b>99.9</b>  | 77.3                         | <b>99.9</b> | -      | 99.6        | 99.8         |
| iSUN            | 91.4                         | 99.8        | -      | 99.8        | <b>99.9</b>  | 79.1                         | 99.7        | -      | 99.4        | <b>99.8</b>  |
| MEAN            | -                            | -           | -      | -           | <b>99.8</b>  | -                            | -           | -      | -           | <b>99.4</b>  |

Table 1: OOD detection performance (%) with a ResNet34 classification model. Our performance is averaged over 5 runs. In the case of SVHN, all baselines did not present their performances. Dash symbols stand for not-available. The mean rows are the averages of the performances over all OOD datasets. For each case, the best results are in bold.

### 3. OOD Detection with Fine-tuned Models (ResNet34)

| InD                                         | OOD       | AUROC | TNR95  |
|---------------------------------------------|-----------|-------|--------|
| CIFAR-10<br>(Acc: 95.2 $\rightarrow$ 94.8)  | SVHN      | 98.80 | 94.61  |
|                                             | TINc      | 99.71 | 99.71  |
|                                             | TINr      | 99.56 | 98.23  |
|                                             | LSUNc     | 99.89 | 99.97  |
|                                             | LSUNr     | 99.70 | 99.00  |
|                                             | iSUN      | 99.57 | 98.26  |
| CIFAR-100<br>(Acc: 77.7 $\rightarrow$ 75.2) | SVHN      | 95.28 | 71.98  |
|                                             | TINc      | 99.36 | 99.89  |
|                                             | TINr      | 98.58 | 92.71  |
|                                             | LSUNc     | 99.60 | 99.98  |
|                                             | LSUNr     | 98.97 | 95.49  |
|                                             | iSUN      | 98.53 | 92.24  |
| SVHN<br>(Acc: 96.5 $\rightarrow$ 96.4)      | CIFAR-10  | 98.96 | 97.04  |
|                                             | CIFAR-100 | 99.03 | 97.26  |
|                                             | TINc      | 99.99 | 100.00 |
|                                             | TINr      | 99.80 | 99.82  |
|                                             | LSUNc     | 99.99 | 100.00 |
|                                             | LSUNr     | 99.79 | 99.93  |
| iSUN                                        | 99.79     | 99.92 |        |

Table 2: Classification and OOD detection performance of fine-tuned ResNet34 models. All figures are in %, and are the average results of 5 experiments each.
